## p120 catenin is required for normal renal tubulogenesis and glomerulogenesis

Denise K. Marciano, Paul R. Brakeman, Chao-Zong Lee, Natalie Spivak, Dennis J. Eastburn, David M. Bryant, Gerard M. Beaudoin III, Ilse Hofmann, Keith E. Mostov and Louis F. Reichardt

There was an error published in *Development* **138**, 2099-2109.

Fig. 8 was not corrected before publication. The correct figure appears below.

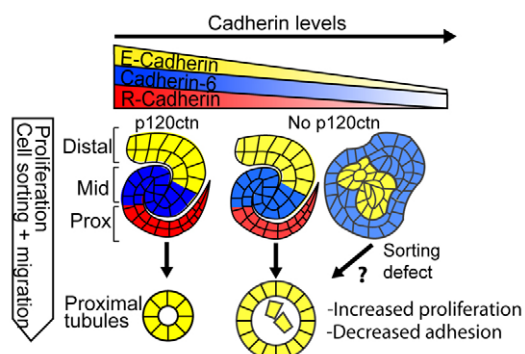

We apologise to the authors and readers for this mistake.
